# Supplementary material
Source: Copernicus journal article supplement (doi:10.5194/bg-23-4011-2026)
Supplement: Supplementary file [file bg-23-4011-2026-supplement-title-page.pdf › bg-23-4011-2026-supplement-title-page.pdf]

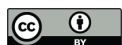

## *Supplement of*

# **Winter fluxes determine the annual carbon balance of an unmanaged subarctic drained peatland**

**Asra Salimi et al.**

*Correspondence to:* Asra Salimi (asrasalimi94@gmail.com)

- bg-23-4011-2026-supplement-title-page.pdf
- AsraSalimi\_Iceland\_DrainedPeatland\_Weekly\_Fluxes\_EnvVariables\_2023\_2024.csv
- README\_Metadata.txt

The copyright of individual parts of the supplement might differ from the article licence.
